# Supplementary material for: EDTA-mediated shape-selective synthesis of Bi2WO6 hierarchical self-assemblies with high visible-light-driven photocatalytic activities
Source: Royal Society of Chemistry journal article supplement (doi:10.1039/c1ce05671a), 2011-01-01
Supplement: c1ce05671a.pdf [file c1ce05671a.pdf]

## Supporting information for

# EDTA-mediated shape-selective synthesis of $\text{Bi}_2\text{WO}_6$ hierarchical self-assemblies with high visible-light-driven photocatalytic activities

Lin Xu, Xiaoyan Yang, Zheng Zhai, Wenhua Hou\*

Key Laboratory of Mesoscopic Chemistry of MOE, School of Chemistry and Chemical

Engineering, Nanjing University, Nanjing 210093, P. R. China.

\*Corresponding author. Fax: +86-25-83317761; Tel: +86-25-83686001; E-mail:

[whou@nju.edu.cn](mailto:whou@nju.edu.cn)

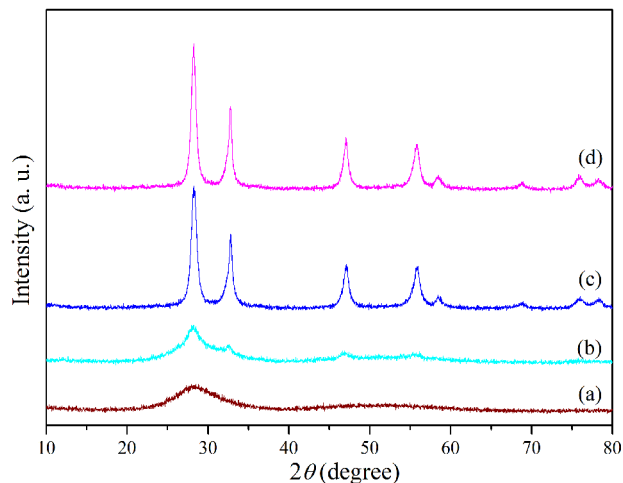

**Supporting Information, Fig. S1.** XRD patterns of the products collected at different reaction time intervals in the presence of 0.2 g EDTA at pH=3. (a) before hydrothermal treatment, and after hydrothermal treatment for (b) 1 h, (c) 3 h, and (d) 6 h.

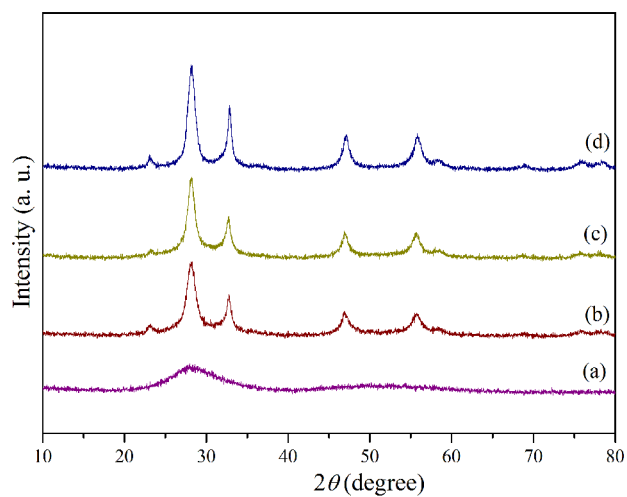

**Supporting Information, Fig. S2.** XRD patterns of the products collected at different time intervals with the aid of 0.40 g EDTA. (a) 1 h, (b) 4 h, (c) 9 h, and (d) 12 h.
